# Supplementary material
Source: Springer Nature journal article supplement (https://www.springermedizin.de/resource/supplementary/12891_2012_1804_MOESM3_ESM.pdf/9509074)
Supplement: MOESM3 [file 9509074]

Abstracts identified  
n = 13511

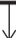

Abstracts for screening  
n = 9711

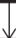

Articles for full text screening  
n = 1591

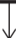

Articles for measure extraction  
n = 515

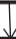

Measures for linking  
Singleitem: n = 370  
Multi-item: n = 105

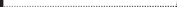

Total number  
of citations  
n = 2469
